# Supplementary material
Source: HighWire-hosted journal article supplement (http://molpharm.aspetjournals.org/highwire/filestream/76831/field_highwire_adjunct_files/0/DRUG_table_for_mp_rev_for_pub.pdf)
Supplement: DRUG_table_for_mp_rev_for_pub.pdf [file DRUG_table_for_mp_rev_for_pub.pdf]

Judith A. Enyeart, Haiyan Liu, and John J. Enyeart -  
cAMP Analogs and Their Metabolites Enhance TREK-1 mRNA and K<sup>+</sup>  
Current Expression in Adrenocortical Cells  
*MOLECULAR PHARMACOLOGY*

SUPPLEMENTAL TABLE 1

| DRUG                  | PKA | Epac |
|-----------------------|-----|------|
| ACTH                  | +   | +    |
| 8-Br-cAMP             | +   | +    |
| 6-Bnz-cAMP            | +   | -    |
| 8CPT-2'-OMe-cAMP      | -   | +    |
| Sp-8CPT-2'-OMe-cAMP   | -   | +    |
| 8CPT-2'-OMe-5'AMP     | -   |      |
| 8CPT-2'-OMe-adenosine | -   |      |
| 8CPT-cAMP             | +   | +    |
| Sp-8CPT-cAMP          | +   | +    |
| 8CPT-adenosine        |     |      |
| 8CPT-adenine          | -   |      |

List of drugs used in the present study and indication of whether specific drug activates (+) or does not activate (-) PKA or Epac. Blanks indicate that PKA and/or Epac activity of drug has not been determined.
